# Supplementary material for: Optimizing rock glaciers activity classification in South Tyrol (North-East Italy): integrating multisource data with statistical modelling
Source: Copernicus journal article supplement (doi:10.5194/egusphere-2024-1511), 2024-07-16
Supplement: Supplementary file 1 [file egusphere-2024-1511-supplement.pdf]

**Optimizing rock glaciers activity classification in South Tyrol: integrating  
multisource data with statistical modelling**

**Supplementary material**

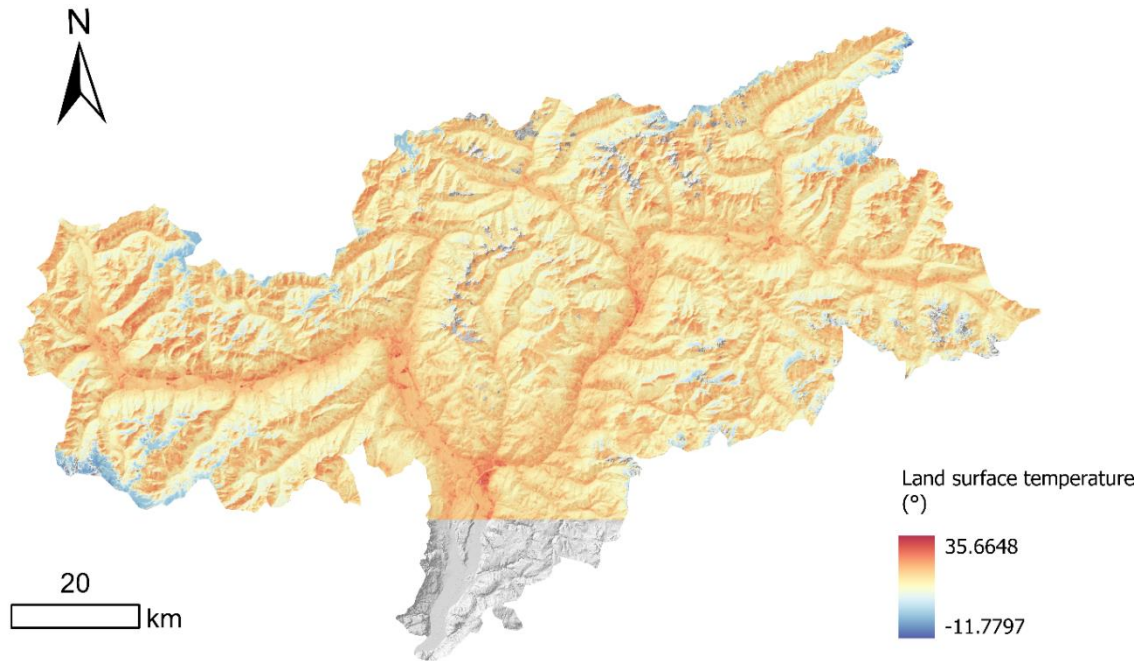

Figure S1: mean land surface temperature for September months between 2013 and 2023.

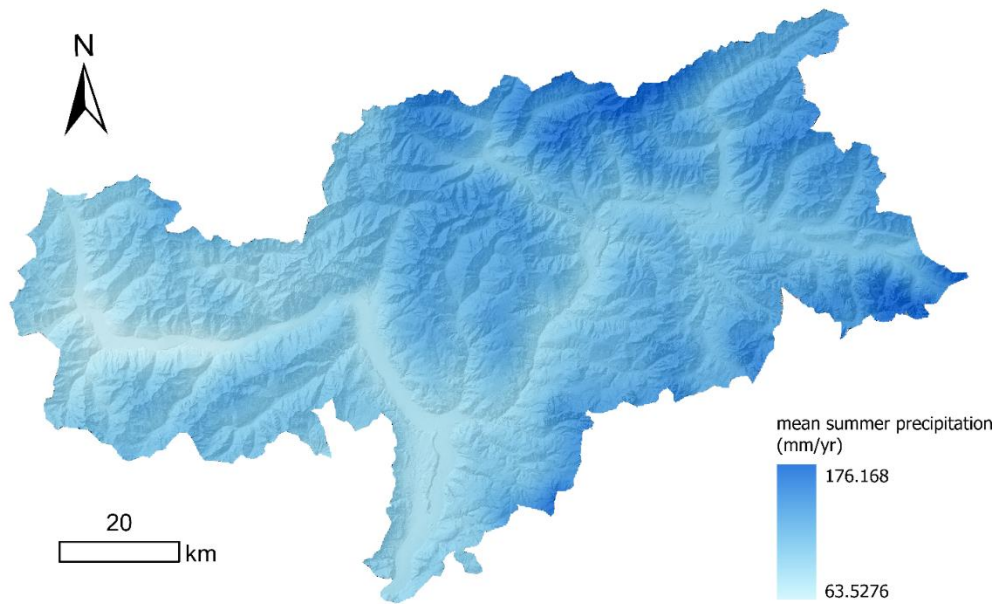

Figure S2: mean summer precipitation (solid and liquid) from 2000 to 2018 computed as interpolation from ground weather station values. See Crespi et al., 2021.

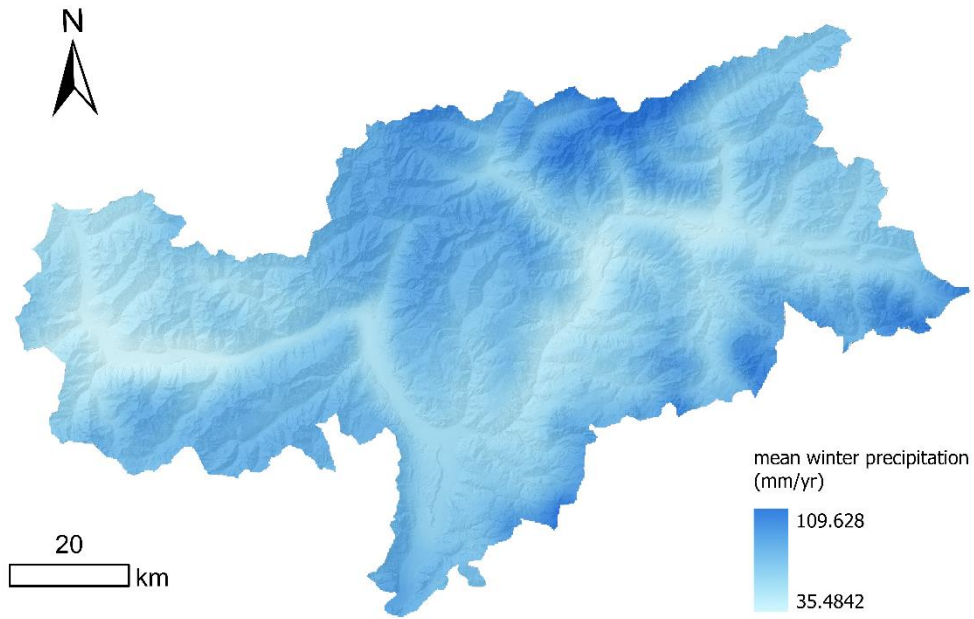

Figure S3: mean winter precipitation (solid and liquid) from 2000 to 2018 computed as interpolation from ground weather station values. See Crespi et al., 2021.

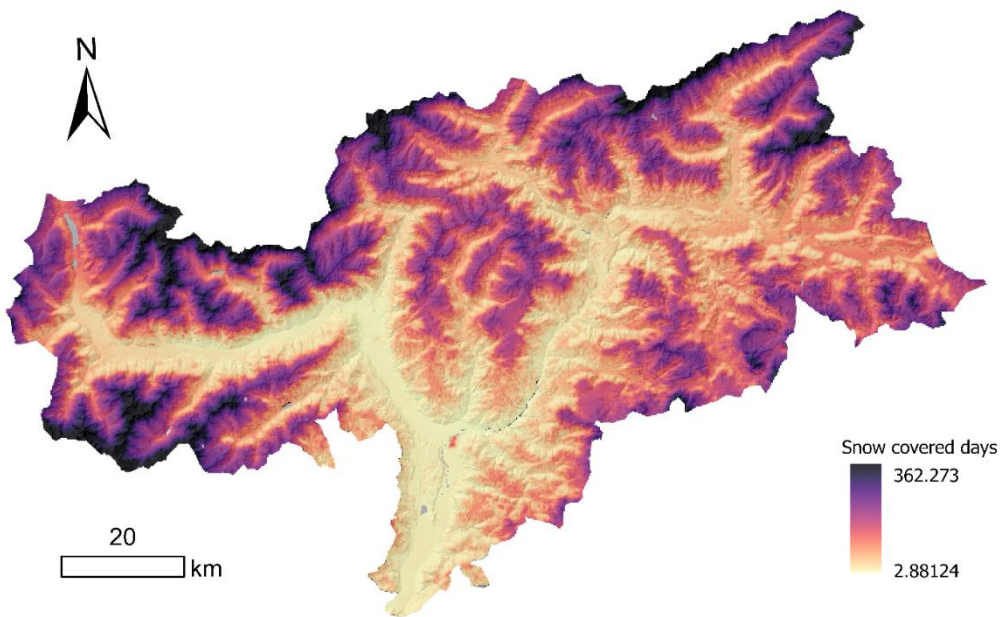

Figure S4: mean snow cover duration (SCD) map from MODIS data. Snow covered days are computed as mean value between 2013 and 2023.

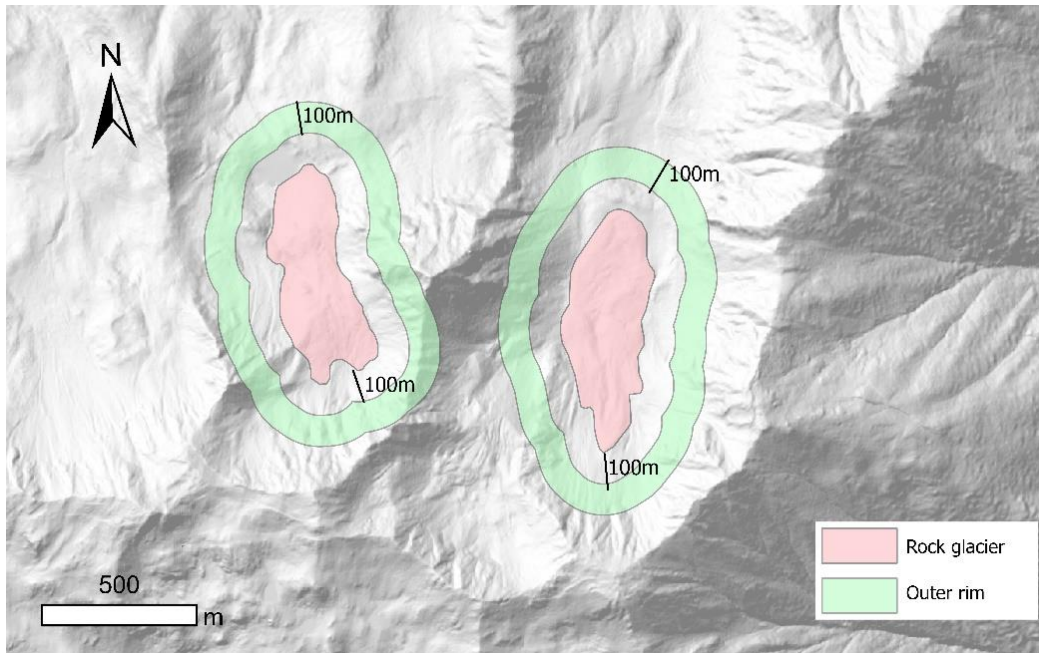

Figure S5: areas used to extract statistics of the environmental and morphological descriptors: rock glacier polygon and the surrounding rim of 100m.
